# Supplementary material for: Development of S4A–BSA–Au NPs for enhanced anti-tumor therapy of canine breast cancer
Source: Royal Society of Chemistry journal article supplement (doi:10.1039/d1na00640a), 2021-10-21
Supplement: d1na00640a1.pdf [file d1na00640a1.pdf]

**A**

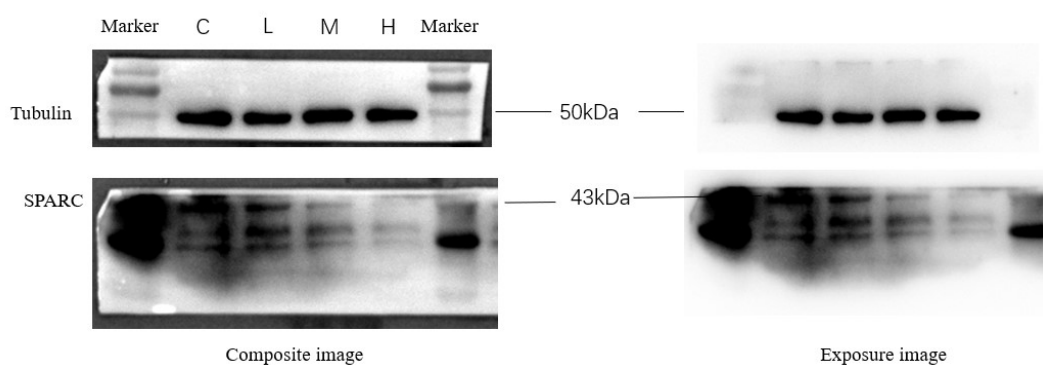

**B**

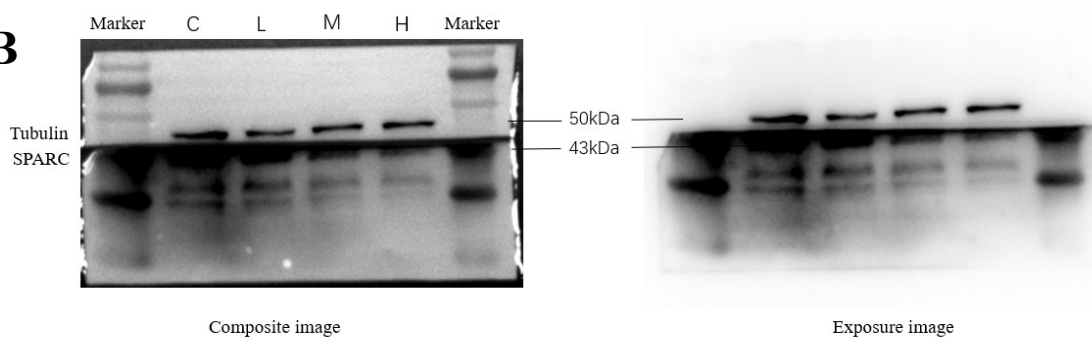

**C**

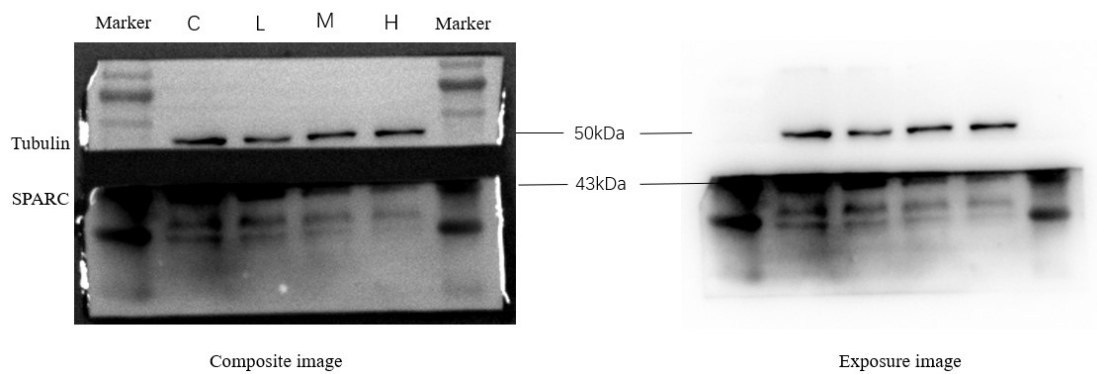

**Fig.1.** A, B and C are images of the same film with different placement.

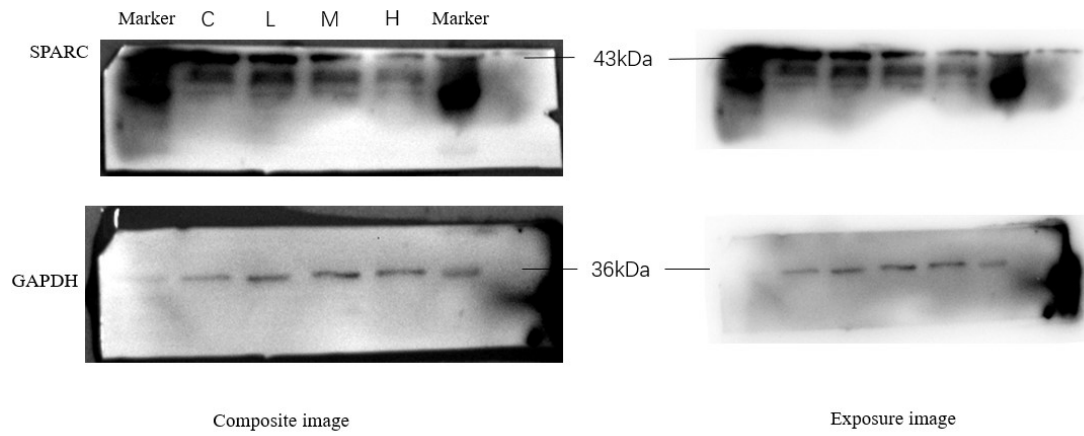

**Fig.1.** The replicated experiment with different internal reference protein.
