# Supplementary figures and images for: Development of S4A–BSA–Au NPs for enhanced anti-tumor therapy of canine breast cancer
Source: Royal Society of Chemistry journal article supplement (doi:10.1039/d1na00640a), 2021-10-21

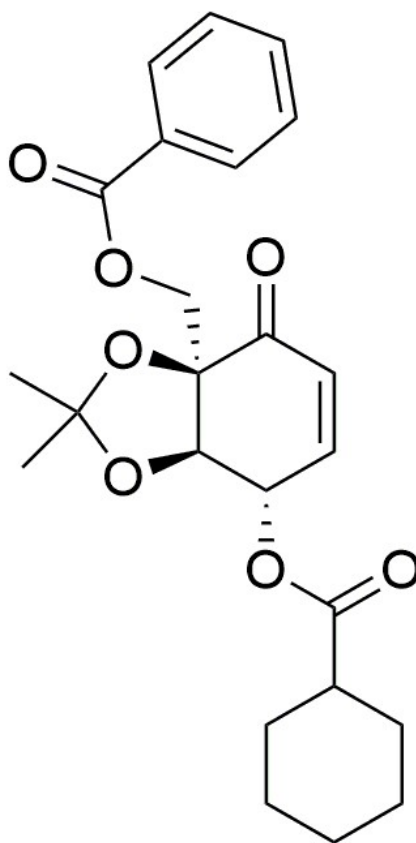

**Fig. S1.** The chemistry structural formula of S4A

Supplement: d1na00640a2.pdf [file d1na00640a2.pdf]
